# Supplementary material for: Evaluating AI Chatbots in Neurological Function Test Interpretation for Brain Tumor Surgery
Source: Research Square preprint supplement (doi:10.21203/rs.3.rs-7240530/v1), 2025-08-11
Supplement: Supplementary file 1 [file 7a87b353286ecda0e457d9a6.pdf]

**Supplementary Table 1. Patient baseline characteristics**

| <b>Variables</b>           | <b>Values, n<br/>(N=20) (%)</b> |
|----------------------------|---------------------------------|
| Mean Age, years (range)    | 59 (38-78)                      |
| Sex                        |                                 |
| Female                     | 4 (20)                          |
| Male                       | 16 (80)                         |
| Pathology                  |                                 |
| Glioma                     | 2 (10)                          |
| Glioblastoma               | 12 (60)                         |
| Metastasis                 | 3 (15)                          |
| Lymphoma                   | 2 (10)                          |
| Meningioma                 | 1 (5)                           |
| Tumor Location             |                                 |
| Left Hemisphere            | 8 (40)                          |
| Right Hemisphere           | 9 (45)                          |
| Bilateral                  | 3 (15)                          |
| Neurological Function Test |                                 |
| SNSB                       | 15 (75)                         |
| Albert Test                | 13 (65)                         |
| Boston Naming Test         | 18 (90)                         |
| Line Bisection Test        | 12 (60)                         |
| Western Aphasia Battery    | 18 (90)                         |
| Handedness                 |                                 |
| Right                      | 18 (90)                         |
| Left                       | 2 (10)                          |

SNSB; Seoul Neuropsychological Screening Battery

**Article title: Evaluating AI Chatbots in Neurological Function Test Interpretation for Brain Tumor Surgery**

**Journal name: Neurosurgical review**

**Author names: Jeeyoung Lee, Eun Ji Lee, Young-Il Kim, Seong-Hoon Lim, Stephen Ahn**

**Corresponding author: Stephen Ahn. M.D., Ph.D. Department of Neurosurgery, Seoul St. Mary's Hospital, College of Medicine, the Catholic University of Korea, Email: [nsstp@catholic.ac.kr](mailto:nsstp@catholic.ac.kr)**
