# Supplementary material for: Evaluating AI Chatbots in Neurological Function Test Interpretation for Brain Tumor Surgery
Source: Research Square preprint supplement (doi:10.21203/rs.3.rs-7240530/v1), 2025-08-11
Supplement: Supplementary file 2 [file cccf075553d12ed00cf1bf99.pdf]

**Supplementary Figure 1. Evaluation of Perplexity’s responses by five brain tumor patients, assessing readability, understandability, accuracy, and overall usefulness.**

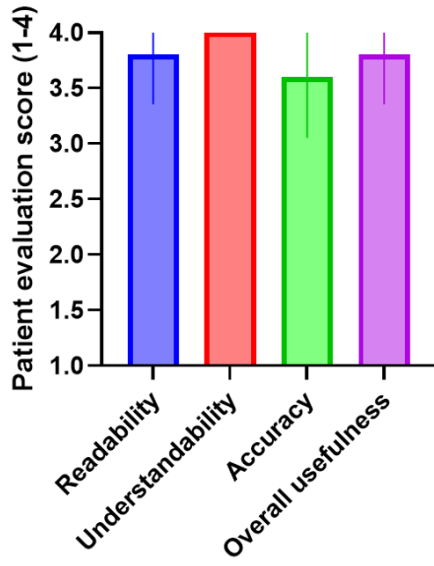

**Article title: Evaluating AI Chatbots in Neurological Function Test Interpretation for Brain Tumor Surgery**

**Journal name: Neurosurgical review**

**Author names: Jeeyoung Lee, Eun Ji Lee, Young-Il Kim, Seong-Hoon Lim, Stephen Ahn**

**Corresponding author: Stephen Ahn. M.D., Ph.D. Department of Neurosurgery, Seoul St. Mary's Hospital, College of Medicine, the Catholic University of Korea, Email: [nsstp@catholic.ac.kr](mailto:nsstp@catholic.ac.kr)**
